# Supplementary material for: Molecular optimization of incorporating pyran fused acceptor–donor–acceptor type acceptors enables over 15% efficiency in organic solar cells
Source: Royal Society of Chemistry journal article supplement (doi:10.1039/d1tc05779k), 2022-01-01
Supplement: d1tc05779k1.pdf [file d1tc05779k1.pdf]

## Supporting Information

### **Molecular Optimization of Incorporating Pyran Fused Acceptor-Donor-Acceptor Type Acceptors Enables over 15% Efficiency in Organic Solar Cells**

*Simin Wu<sup>a</sup>, Lingxian Meng<sup>a</sup>, Zhe Zhang<sup>a</sup>, Mingpeng Li<sup>a</sup>, Yang Yang<sup>b</sup>, Jian Wang<sup>b</sup>, Hongbin Chen<sup>a</sup>, Changzun Jiang<sup>a</sup>, Xiangjian Wan<sup>a</sup>, Chenxi Li<sup>a</sup>, Zhaoyang Yao<sup>\*a</sup>, Yongsheng Chen<sup>\*a</sup>*

<sup>a</sup>State Key Laboratory and Institute of Elemento-Organic Chemistry, The Centre of Nanoscale Science and Technology and Key Laboratory of Functional Polymer Materials, Renewable Energy Conversion and Storage Center (RECAST), College of Chemistry, Nankai University, Tianjin 300071, China

<sup>b</sup>The Institute of Seawater Desalination and Multipurpose Utilization, Ministry of Natural Resources (Tianjin), Tianjin 300192, China

E-mail: [yschen99@nankai.edu.cn](mailto:yschen99@nankai.edu.cn); [zyao@nankai.edu.cn](mailto:zyao@nankai.edu.cn)

### **Experimental Section**

**Materials and synthesis.** All reactions and manipulations were carried out under argon atmosphere with the use of standard Schlenk techniques. All starting materials were purchased from commercial suppliers and used without further purification unless indicated otherwise. Polymer donor PM6 was purchased from Solarmer Material (Beijing) Inc. 3-Bromo-4-n-octylthiophene (compound 3) and 2,7-dibromo-3,6-dimethoxy-9,9-dioctyl-9H-fluorene (compound 7) were synthesized according to the literatures.<sup>1, 2</sup>

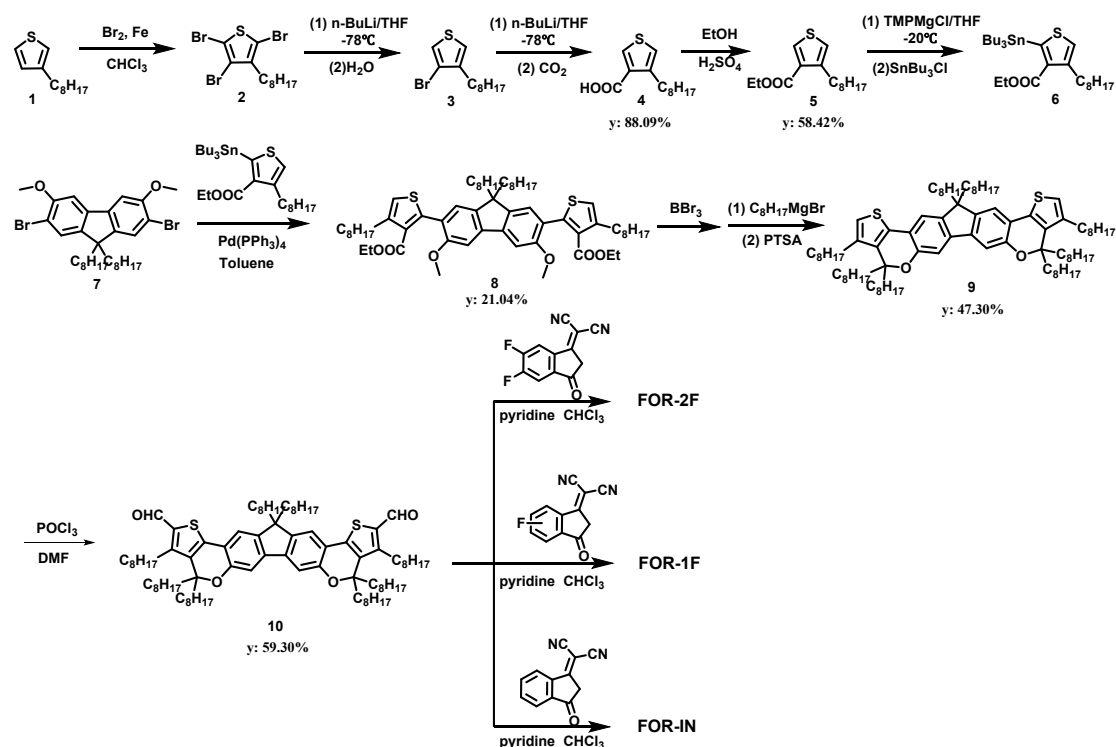

**Scheme S1.** Synthetic Route of FOR-2F, FOR-1F and FOR-IN.

**Synthesis of Compound 4.** Compound 3 (2.73 g, 9.92 mmol) was dissolved in 50 ml dry THF and the reaction mixture was cooled down to  $-78^\circ\text{C}$ . Then 6.82 ml  $n\text{-BuLi}$  (1.6 M solution in hexane) was added slowly, and the reaction mixture was stirred at  $-78^\circ\text{C}$  for half an hour. Then dry ice (4.36 g, 99.18 mmol) was added to the solution. After 4 h stirring, the reaction was quenched by water and extracted with  $\text{CH}_2\text{Cl}_2$  (50 mL  $\times$  2). The combined organic layer was dried over anhydrous  $\text{Na}_2\text{SO}_4$ , the solvent was removed under reduced pressure to give **4** (2.10 g, 88%) as a dark oil which was used without further purification.

**Synthesis of Compound 5.** Compound 4 (2.10 g, 8.74 mmol) was dissolved in 50 ml dry EtOH,  $\text{H}_2\text{SO}_4$  (1 ml) was added slowly, the mixture was heated to  $80^\circ\text{C}$  for 12 h. After cooling to room temperature, the mixture was poured into water and then

extracted with  $\text{CH}_2\text{Cl}_2$  (50 mL  $\times$  2). The combined organic layer was dried over anhydrous  $\text{Na}_2\text{SO}_4$ , and the solvent was removed under vacuum, the crude product was purified by column chromatography (petroleum ether/ $\text{CH}_2\text{Cl}_2$  2:1) to give colorless oil (1.37 g, 58%).

$^1\text{H}$  NMR (400 MHz,  $\text{CDCl}_3$ ):  $\delta$  8.06 (s, 1H), 6.90 (s, 1H), 4.29 (q,  $J$  = 6.9 Hz, 2H), 2.92 – 2.85 (t, 3H), 1.62 (m,  $J$  = 14.1, 7.0 Hz, 3H), 1.40 – 1.31 (m, 6H), 0.87 (m,  $J$  = 13.7, 5.9 Hz, 8H).

$^{13}\text{C}$  NMR (101 MHz,  $\text{CDCl}_3$ )  $\delta$  163.15, 144.22, 134.14, 131.74, 121.78, 60.26, 31.90, 30.19, 29.98, 29.57, 29.51, 29.32, 22.69, 14.33, 14.10.

**Synthesis of Compound 6.** Compound 5 (430 mg, 1.60 mmol) was dissolved in 50 ml dry THF and the reaction mixture was cooled down to  $-20\text{ }^\circ\text{C}$ . Then 2.40 ml  $\text{TMPMgCl}$  (1 M solution in hexane) was added slowly, and the reaction mixture was stirred at  $-20\text{ }^\circ\text{C}$  for 2 h. Then  $\text{SnBu}_3\text{Cl}$  (0.84 ml, 2.88 mmol) was added to the solution. and the reaction mixture was stirred at room temperature for 3 h. After that, the mixture was poured into water and then extracted with  $\text{CH}_2\text{Cl}_2$  (50 mL  $\times$  2). The combined organic layer was dried over anhydrous  $\text{Na}_2\text{SO}_4$ , the solvent was removed under reduced pressure to give **6** (0.84 g, 94%) as a dark oil which was used without further purification.

**Synthesis of Compound 8.** A solution of 2,7-dibromo-3,6-dimethoxy-9,9-dioctyl-9H-

fluorene (2 g, 3.29 mmol) and compound 6 (5.50 g, 9.86 mmol) in 100 mL DMF and was degassed twice with argon. Then Pd(PPh<sub>3</sub>)<sub>4</sub> (0.19 g, 0.16 mmol) was added and the mixture was stirred at 120 °C for 24 h under argon, after which the mixture was poured into water (100 mL), and extracted with dichloromethane (100 mL × 2). The organic layer was then dried over anhydrous Na<sub>2</sub>SO<sub>4</sub>. The solvent was removed and the crude product was purified by column chromatography to obtain a yellow oil (0.68 g, 21%).

<sup>1</sup>H NMR (400 MHz, CDCl<sub>3</sub>): δ 7.27 (s, 2H), 7.21 (s, 2H), 6.94 (s, 2H), 4.08 (q, J = 7.1 Hz, 4H), 3.87 (s, 6H), 2.88 – 2.80 (t, 6H), 1.98 – 1.83 (m, 4H), 1.66 (d, J = 14.9 Hz, 8H), 1.39 – 1.21 (m, 24H), 0.99 (m, J = 5.5 Hz, 10H), 0.86 (m, J = 9.9, 7.6, 3.7 Hz, 24H).

<sup>13</sup>C NMR (101 MHz, CDCl<sub>3</sub>): δ 165.14, 156.04, 145.01, 143.95, 143.34, 142.01, 130.37, 124.92, 123.11, 119.99, 101.73, 60.06, 55.59, 54.35, 40.21, 31.95, 31.85, 31.64, 30.17, 30.13, 30.03, 29.68, 29.54, 29.36, 29.34, 29.25, 22.73, 22.66, 22.62, 14.12, 14.07.

**Synthesis of Compound 9.** Compound 8 (0.68 g, 0.69 mmol) was dissolved in 50 mL dry CH<sub>2</sub>Cl<sub>2</sub> and the reaction mixture was cooled down to -78 °C. Then 3.46 mL BBr<sub>3</sub> (1.0 M solution in CH<sub>2</sub>Cl<sub>2</sub>) was added slowly, and the reaction mixture was stirred at room temperature for 12 h. After that, the reaction was quenched by water and extracted with CH<sub>2</sub>Cl<sub>2</sub>. After dried over anhydrous Na<sub>2</sub>SO<sub>4</sub>, the precipitation was dissolved in 50 mL dry THF and 3.5 mL octyl-magnesium bromide (2.0 M solution in diethyl ether) was added at -78 °C. Then the reaction was stirred at room temperature for 12 h, and

the mixture was extracted with  $\text{CH}_2\text{Cl}_2$  (100 mL  $\times$  3). The organic layer was dried over anhydrous  $\text{Na}_2\text{SO}_4$ , and after removal of the solvent, the crude product was dissolved in 50 mL toluene, and reacted with p-toluene sulfonic acid (0.28 g, 1.45 mmol) at 110°C for 12 h. The mixture was extracted with  $\text{CH}_2\text{Cl}_2$  and water, dried over anhydrous  $\text{Na}_2\text{SO}_4$ , and was purified by silica gel chromatography using petroleum ether as eluent, yielding a solid product 9 (0.42 g, 47%).

$^1\text{H}$  NMR (400 MHz,  $\text{CDCl}_3$ )  $\delta$  7.11 (s, 2H), 7.04 (s, 2H), 6.84 (s, 2H), 2.56 – 2.46 (m, 4H), 2.05 – 1.76 (t, 14H), 1.76 – 1.66 (m, 4H), 1.43 (m, 18H), 1.33 – 1.11 (m, 38H), 0.83 (m, 34H).

$^{13}\text{C}$  NMR (101 MHz,  $\text{CDCl}_3$ )  $\delta$  151.24, 143.66, 141.51, 140.07, 135.13, 134.14, 125.54, 118.34, 118.29, 116.18, 106.96, 85.80, 54.04, 40.68, 40.39, 32.26, 31.98, 31.91, 30.36, 30.09, 30.00, 29.86, 29.79, 29.65, 29.56, 29.35, 29.03, 24.03, 23.81, 22.75, 22.71, 14.45, 14.12.

**Synthesis of Compound 10.**  $\text{POCl}_3$  (0.22 mL) was added drop by drop to DMF (2 mL) at 0°C under the protection of argon and then stirred at room temperature for 5 h to gain the Vilsmerier reagent. The Vilsmerier reagent was added into a 1,2-dichloroethane (50 mL) solution of compound 9 (0.42 g, 0.33 mmol). The above reaction mixture was stirred at room atmosphere for 1 h and then heated to 80 °C for 12 h. The mixture was quenched with  $\text{CH}_3\text{COONa}$  (aq.), and then extracted with  $\text{CH}_2\text{Cl}_2$  (50 mL  $\times$  2). The combined organic layer was dried over anhydrous  $\text{Na}_2\text{SO}_4$  and purified by silica gel, yielding a yellow solid (0.26 g, 59%).

$^1\text{H}$  NMR (400 MHz,  $\text{CDCl}_3$ )  $\delta$  10.02 (s, 2H), 7.23 (s, 2H), 7.07 (s, 2H), 2.94 – 2.84 (t, 4H), 2.05 – 1.82 (m, 12H), 1.56 (d,  $J$  = 73.4 Hz, 14H), 1.26 (dd,  $J$  = 24.8, 12.3 Hz, 74H), 0.94 – 0.69 (m, 32H).

$^{13}\text{C}$  NMR (101 MHz,  $\text{CDCl}_3$ )  $\delta$  180.56, 151.54, 148.60, 143.36, 142.73, 142.58, 135.08, 135.04, 116.47, 116.00, 106.39, 84.60, 53.13, 40.22, 39.35, 32.13, 30.92, 30.83, 30.78, 30.49, 30.41, 29.23, 29.18, 29.12, 28.86, 28.79, 28.69, 28.43, 28.32, 28.23, 28.19, 28.17, 27.08, 23.00, 22.82, 21.63, 21.61, 13.07, 13.05.

MS (MALDI-TOF): calcd for  $\text{C}_{89}\text{H}_{142}\text{O}_4\text{S}_2$  [ $\text{M}^+$ ] 1340.23; found: 1340.40.

**Synthesis of Compound FOR-IN.** Under the protection of argon, compound 10 (100 mg, 0.08 mmol) and 3-(Dicyanomethylidene)indan-1-one (144.9 mg, 0.80 mmol) was dissolved in dry chloroform (50 mL), followed by the addition of pyridine (0.5 mL). After stirring at room temperature for 12 h, the mixture was poured into water and then extracted with  $\text{CHCl}_3$  (50 mL  $\times$  2). The organic layer was dried over anhydrous  $\text{Na}_2\text{SO}_4$  for 3 h. After removal of solvent, the crude product was purified by silica gel, and then recrystallized from  $\text{CHCl}_3$  and methanol to give FOR-IN as a dark blue solid (105 mg, 83%).

$^1\text{H}$  NMR (400 MHz,  $\text{CDCl}_3$ )  $\delta$  9.03 (s, 2H), 8.73 (d,  $J$  = 7.7 Hz, 2H), 7.96 (d,  $J$  = 5.5 Hz, 2H), 7.77 (m, 4H), 7.47 (s, 2H), 7.11 (s, 2H), 3.02 – 2.91 (m, 4H), 2.02 (d,  $J$  = 11.7 Hz, 12H), 1.56 (s, 14H), 1.18 (dd,  $J$  = 58.0, 28.1 Hz, 74H), 0.95 – 0.66 (m, 32H).

$^{13}\text{C}$  NMR (101 MHz,  $\text{CDCl}_3$ ):  $\delta$  188.73, 161.39, 156.94, 153.79, 150.25, 144.98, 140.00, 136.94, 136.53, 135.00, 134.56, 134.28, 131.56, 125.22, 123.50, 120.53,

118.23, 117.29, 115.37, 115.05, 107.65, 86.17, 77.32, 77.21, 77.01, 76.69, 68.01, 54.68, 41.54, 40.66, 33.27, 31.86, 31.78, 30.50, 29.90, 29.77, 29.49, 29.44, 29.31, 29.25, 24.07, 23.90, 22.68, 22.62, 14.12, 14.07.

MS (MALDI-TOF): calcd for  $C_{113}H_{150}N_4O_4S_2$  [ $M^+$ ] 1692.59; found: 1692.11.

**Synthesis of Compound FOR-1F.** Under the protection of argon, compound 10 (100 mg, 0.08 mmol) and 2-(5 or 6-fluoro-3-oxo-2,3-dihydro-1H-inden-1-ylidene)malononitrile (158.3 mg, 0.80 mmol) was dissolved in dry chloroform (50 mL), followed by the addition of pyridine (0.5 mL). After stirring at room temperature for 12 h, the mixture was poured into water and then extracted with  $CHCl_3$  (50 mL  $\times$  2). The organic layer was dried over anhydrous  $Na_2SO_4$  for 3 h. After removal of solvent, the crude product was purified by silica gel, and then recrystallized from  $CHCl_3$  and methanol to give FOR-1F as a dark blue solid (110 mg, 85%).

$^1H$  NMR (400 MHz,  $CDCl_3$ ):  $\delta$  8.99 (s, 2H), 8.72 (m, 0.58H), 8.40 (d, 1.58H), 7.94 (m, 1.52H), 7.57 (d, 0.6H), 7.44 (s, 2H), 7.40 (d, 1.47H), 7.09 (s, 2H), 2.94 (t, 4H), 1.98 (t, 12H), 1.62 – 1.38 (m, 14H), 1.36 – 1.01 (m, 74H), 0.95 – 0.68 (m, 32H).

$^{13}C$  NMR (101 MHz,  $CDCl_3$ ):  $\delta$  187.27, 167.96, 165.40, 159.89, 157.35, 153.85, 150.91, 145.13, 145.04, 142.19, 136.61, 134.60, 133.04, 131.54, 121.68, 120.29, 118.28, 117.29, 115.08, 114.61, 112.89, 107.74, 86.21, 68.69, 54.69, 41.52, 40.63, 33.30, 31.85, 31.78, 30.51, 29.89, 29.76, 29.48, 29.44, 29.30, 29.25, 29.15, 24.07, 23.90, 22.67, 22.65, 22.62, 22.59, 14.12, 14.09, 14.07, 14.04.

MS (MALDI-TOF): calcd for  $C_{113}H_{148}F_2N_4O_4S_2$  [ $M^+$ ] 1728.57; found: 1728.09.

**Synthesis of Compound FOR-2F.** Under the protection of argon, compound 10 (100 mg, 0.08 mmol) and 2-(5,6-difluoro-3-oxo-2,3-dihydro-1H-inden-1-ylidene)malononitrile (171 mg, 0.80 mmol) was dissolved in dry chloroform (50 mL), followed by the addition of pyridine (0.5 mL). After stirring at room temperature for 12 h, the mixture was poured into water and then extracted with CHCl<sub>3</sub> (50 mL × 2). The organic layer was dried over anhydrous Na<sub>2</sub>SO<sub>4</sub> for 3 h. After removal of solvent, the crude product was purified by silica gel, and then recrystallized from CHCl<sub>3</sub> and methanol to give FOR-2F as a dark blue solid (101 mg, 77%).

<sup>1</sup>H NMR (400 MHz, CDCl<sub>3</sub>): δ 9.03 (s, 2H), 8.60 (dd, J = 10.0, 6.5 Hz, 2H), 7.74 (t, J = 7.5 Hz, 2H), 7.51 (s, J = 24.5 Hz, 2H), 7.08 (s, J = 48.2 Hz, 2H), 2.98 (t, 4H), 2.29 – 1.99 (m, 12H), 1.70 – 1.46 (m, 14H), 1.49 – 1.05 (m, 74H), 1.01 – 0.54 (m, 34H).

<sup>13</sup>C NMR (101 MHz, CDCl<sub>3</sub>): δ 186.30, 159.20, 157.76, 153.94, 145.26, 145.11, 136.74, 134.62, 134.48, 131.53, 119.58, 118.32, 114.92, 114.62, 107.81, 86.24, 68.48, 54.69, 41.51, 40.60, 33.35, 31.85, 31.79, 31.78, 30.50, 29.87, 29.74, 29.48, 29.44, 29.30, 29.25, 24.07, 23.90, 22.67, 22.62, 14.12, 14.07.

MS (MALDI-TOF): calcd for C<sub>113</sub>H<sub>146</sub>F<sub>4</sub>N<sub>4</sub>O<sub>4</sub>S<sub>2</sub> [M<sup>+</sup>] 1764.55; found: 1764.08.

**Measurements and Instruments.** The <sup>1</sup>H and <sup>13</sup>C nuclear magnetic resonance (NMR) spectra were taken on a Bruker AV400 Spectrometer. Matrix assisted laser



desorption/ionization time-of-flight (MALDI-TOF) mass spectrometry were performed on a Bruker Autoflex III instrument. Varian 7.0T FTMS was used to achieve the HR-MS data. UV-vis spectra were obtained with a Cary 5000 Spectrophotometers. Cyclic voltammogram (CV) was performed with a LK2010 Microcomputerbased Electrochemical Analyzer by using a three-electrode electrolytic cell with a film working electrode, a platinum counter electrode, and a calomel reference electrode. In a solution of acetonitrile using tetrabutylammonium hexafluorophosphate ( $\text{Bu}_4\text{NPF}_6$ ) as the electrolyte, a low potential sweep rate of  $100 \text{ mV s}^{-1}$  was used and the electrochemically reversible ferrocene (Fc) was employed as internal reference during our CV measurements. Thermogravimetric analyses (TGA) were carried out on a NETZSCH STA 449 F5 Jupiter instrument under a purified nitrogen gas. The heating rate is a  $10 \text{ }^\circ\text{C min}^{-1}$  heating rate. The current density-voltage ( $J$ - $V$ ) curves of photovoltaic devices were obtained by a Keithley 2400 source-measure unit. The photocurrent was measured under simulated illumination of  $100 \text{ mW cm}^{-2}$  with AM1.5G irradiation using a xenon-lamp-based solar simulator [Oriel 96000] in an argon-filled glove box. External quantum efficiency values (EQEs) of the encapsulated devices were obtained with a halogen-tungsten lamp, monochromator, optical chopper, and lock-in amplifier in air and the photon flux was determined by a calibrated silicon photodiode. Atomic force microscopy (AFM) images were performed using in tapping mode on a Bruker MultiMode 8 atomic force microscope. The GIWAXS (grazing incidence wide angle X-ray scattering) samples were prepared on ZnO-coated Si substrates using the same preparation conditions as for devices. SCLC was used to

measure hole and electron mobilities, using a diode configuration of ITO/PEDOT:PSS/active layer/Au for hole and glass/ZnO/active layer/Al for electron by taking the dark current density in the range of 0–8 V and fitting the results to a space charge limited form.

***Fabrication of OPV devices.*** The photovoltaic devices were fabricated with a structure of indium tin oxide (ITO)/ZnO/PFN-Br/ donor:acceptor /MoOx/Ag. The ITO-coated glass substrates were cleaned by ultrasonic treatment in detergent, deionized water, acetone, and isopropyl alcohol under ultrasonication for 15 minutes each time and subsequently dried by a nitrogen flow. A 30 nm thick layer of ZnO precursor solution was spin-coated (3000 rpm) onto the ITO surface. After baked at 200 °C for 60 min, the substrates were transferred into an argon-filled glove box. A thin film of PFN-Br was spin-coated on ZnO. Subsequently, the active layer was spin-coated from blend chlorobenzene solutions and then MoOx (~6 nm) and Ag (~70 nm) was successively evaporated onto the active layer through a shadow mask.

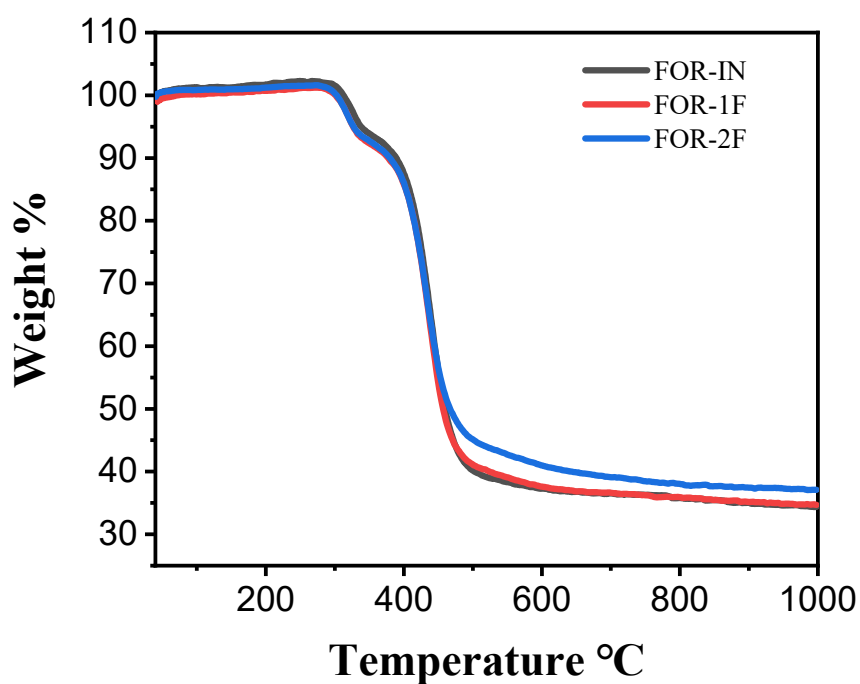

**Fig. S1** TGA curves of FOR-IN, FOR-1F and FOR-2F with a heating rate of 10 °C/min under N<sub>2</sub> atmosphere.

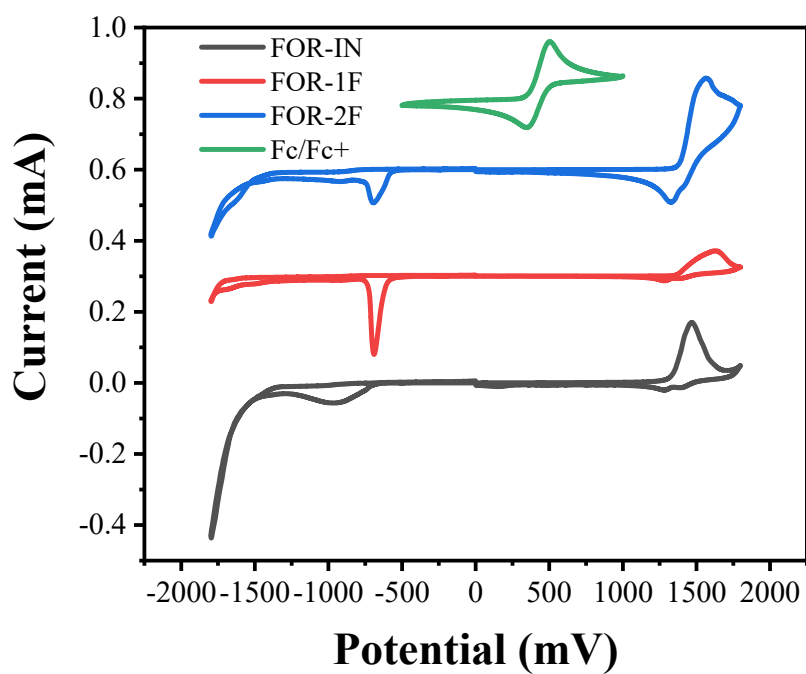

**Fig. S2** Cyclic voltammogram of FOR-IN, FOR-1F, FOR-2F and Fc/Fc<sup>+</sup> in acetonitrile solution with 0.1 mol L<sup>-1</sup> *n*-Bu<sub>4</sub>NPF<sub>6</sub> at a scan rate of 100 mV s<sup>-1</sup>

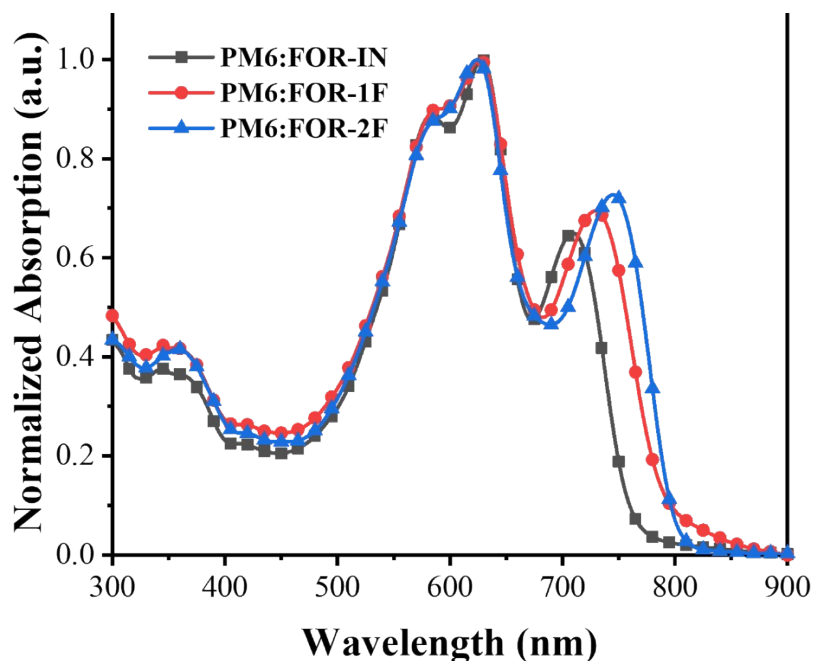

**Fig. S3** The absorption spectra of PM6:FOR-IN, PM6:FOR-1F and PM6:FOR-2F blend films.

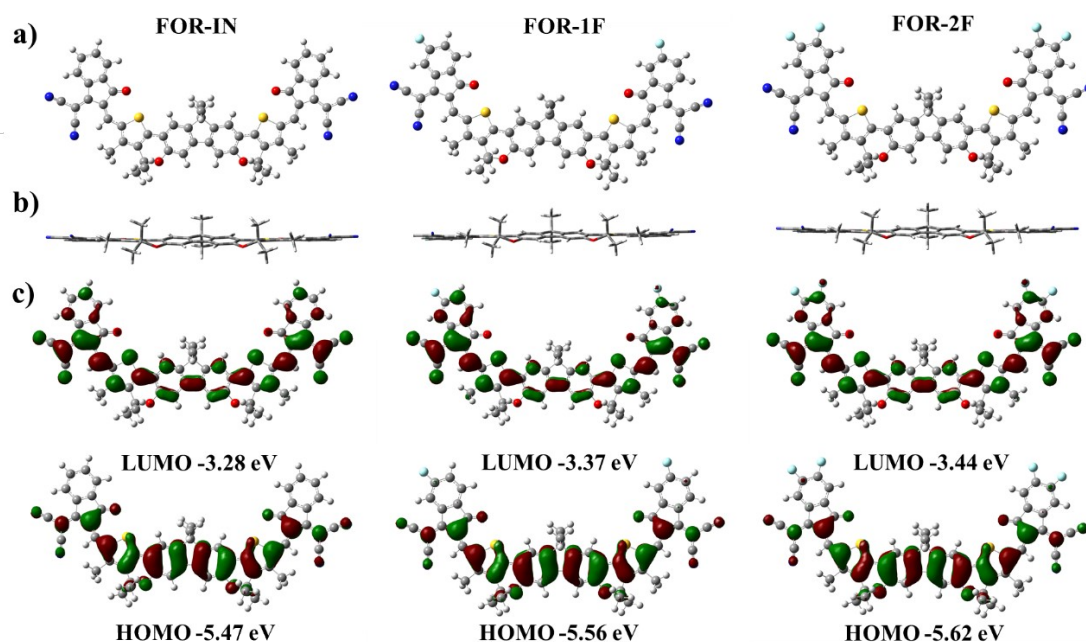

**Fig. S4** The optimized geometries for FOR-IN, FOR-1F and FOR-2F from (a) top view and (b) side view. (c) Theoretical density distribution for the frontier molecular orbitals of FOR-IN, FOR-1F and FOR-2F. All calculations were carried out using Gaussian 16

**Table S1.** Performance of the OSCs with different PM6 (D)/ FOR-IN (A) ratios.

| D:A   | $V_{OC}$ (V) | $FF$ (%) | $J_{SC}$ (mA/cm <sup>2</sup> ) | PCE (%) |
|-------|--------------|----------|--------------------------------|---------|
| 1:0.8 | 1.111        | 51.84    | 13.05                          | 7.52    |
| 1:1   | 1.105        | 52.82    | 13.31                          | 7.77    |

|       |       |       |       |      |
|-------|-------|-------|-------|------|
| 1:1.2 | 1.104 | 52.18 | 12.51 | 7.20 |
|-------|-------|-------|-------|------|

**Table S2.** Photovoltaic performance of solar cells based on PM6:FOR-IN (1:1, w/w) blend films with different TA temperature.

| TA (°C) | $V_{OC}$ (V) | FF (%) | $J_{SC}$ (mA/cm <sup>2</sup> ) | PCE (%) |
|---------|--------------|--------|--------------------------------|---------|
| none    | 1.111        | 51.84  | 13.05                          | 7.52    |
| 120     | 1.071        | 57.98  | 15.38                          | 9.55    |
| 140     | 1.073        | 55.72  | 14.68                          | 8.78    |

**Table S3.** Performance of the OSCs based on PM6:FOR-IN (1:1, w/w) blend films with different additives.

| Additives | $V_{OC}$ (V) | FF (%) | $J_{SC}$ (mA/cm <sup>2</sup> ) | PCE (%) |
|-----------|--------------|--------|--------------------------------|---------|
| none      | 1.071        | 57.98  | 15.38                          | 9.55    |
| DIO       | 1.060        | 55.25  | 15.08                          | 8.83    |
| CN        | 1.040        | 57.30  | 13.80                          | 8.21    |

**Table S4.** Performance of the OSCs with different PM6 (D)/ FOR-1F (A) ratios.

| D:A   | $V_{OC}$ (V) | FF (%) | $J_{SC}$ (mA/cm <sup>2</sup> ) | PCE (%) |
|-------|--------------|--------|--------------------------------|---------|
| 1:0.8 | 1.037        | 57.38  | 16.59                          | 9.87    |
| 1:1   | 1.034        | 59.04  | 16.90                          | 10.32   |
| 1:1.2 | 1.030        | 58.42  | 17.05                          | 10.26   |

**Table S5.** Photovoltaic performance of the solar cells based on PM6:FOR-1F (1:1, w/w) blend films with different TA temperature.

| TA (°C) | $V_{OC}$ (V) | FF (%) | $J_{SC}$ (mA/cm <sup>2</sup> ) | PCE (%) |
|---------|--------------|--------|--------------------------------|---------|
| none    | 1.034        | 59.04  | 16.90                          | 10.32   |
| 120     | 1.007        | 59.20  | 18.97                          | 11.31   |
| 140     | 1.012        | 62.10  | 18.84                          | 11.84   |
| 160     | 1.002        | 60.50  | 18.33                          | 11.13   |

**Table S6.** Performance of the OSCs based on PM6:FOR-1F (1:1, w/w) blend films with different additives.

| Additive | $V_{OC}$ (V) | FF (%) | $J_{SC}$ (mA/cm <sup>2</sup> ) | PCE (%) |
|----------|--------------|--------|--------------------------------|---------|
| none     | 1.034        | 59.04  | 16.90                          | 10.32   |
| DIO      | 1.013        | 63.00  | 18.99                          | 12.13   |

|    |       |       |       |       |
|----|-------|-------|-------|-------|
| CN | 1.009 | 63.50 | 18.38 | 11.78 |
|----|-------|-------|-------|-------|

**Table S7.** Performance of the OSCs based on PM6:FOR-1F (1:1, w/w) blend films with different DIO ratios.

| Additive(v/v) | $V_{OC}$ (V) | FF (%) | $J_{SC}$ (mA/cm <sup>2</sup> ) | PCE (%) |
|---------------|--------------|--------|--------------------------------|---------|
| 0.3           | 1.013        | 63.00  | 18.99                          | 12.13   |
| 0.5           | 1.020        | 66.21  | 18.65                          | 12.59   |
| 0.7           | 1.010        | 62.30  | 18.01                          | 11.33   |

**Table S8.** Performance of the OSCs with different PM6 (D)/ FOR-2F (A) ratios.

| D:A   | $V_{OC}$ (V) | FF (%) | $J_{SC}$ (mA/cm <sup>2</sup> ) | PCE (%) |
|-------|--------------|--------|--------------------------------|---------|
| 1:0.8 | 0.997        | 65.27  | 18.16                          | 11.81   |
| 1:1   | 0.994        | 65.25  | 18.84                          | 12.22   |
| 1:1.2 | 0.976        | 61.82  | 18.51                          | 11.17   |

**Table S9.** Photovoltaic performance of the solar cells based on PM6:FOR-2F (1:1, w/w) blend films with different TA temperature.

| TA (°C) | $V_{OC}$ (V) | FF (%) | $J_{SC}$ (mA/cm <sup>2</sup> ) | PCE (%) |
|---------|--------------|--------|--------------------------------|---------|
| none    | 0.994        | 65.25  | 18.84                          | 12.22   |
| 120     | 0.968        | 70.00  | 20.34                          | 13.79   |
| 140     | 0.971        | 71.60  | 20.84                          | 14.49   |
| 160     | 0.961        | 70.20  | 20.65                          | 13.92   |

**Table S10.** Performance of the OSCs based on PM6:FOR-2F (1:1, w/w) blend films with different additives.

| Additive | $V_{OC}$ (V) | FF (%) | $J_{SC}$ (mA/cm <sup>2</sup> ) | PCE (%) |
|----------|--------------|--------|--------------------------------|---------|
| none     | 1.034        | 59.04  | 16.90                          | 10.32   |
| DIO      | 0.969        | 73.47  | 21.25                          | 15.18   |
| CN       | 0.968        | 71.60  | 21.12                          | 14.65   |

**Table S11.** Performance of the OSCs based on PM6:FOR-2F (1:1, w/w) blend films with different DIO ratios.

| Additive(v/v) | $V_{OC}$ (V) | FF (%) | $J_{SC}$ (mA/cm <sup>2</sup> ) | PCE (%) |
|---------------|--------------|--------|--------------------------------|---------|
| 0.1           | 0.969        | 72.46  | 20.48                          | 14.39   |

|     |       |       |       |       |
|-----|-------|-------|-------|-------|
| 0.3 | 0.969 | 73.47 | 21.25 | 15.18 |
| 0.5 | 0.972 | 72.40 | 20.65 | 14.54 |
| 0.7 | 0.973 | 71.30 | 20.68 | 14.35 |

**Table S12.** Summary of the GIWAXS parameters for PM6:FOR-IN, PM6:FOR-1F and PM6:FOR-2F films.

| blends     |                | out-of-plane         |                 |                                |                          |
|------------|----------------|----------------------|-----------------|--------------------------------|--------------------------|
|            |                | $q(\text{\AA}^{-1})$ | $d(\text{\AA})$ | $\text{Fwfm}(\text{\AA}^{-1})$ | $\text{CCL}(\text{\AA})$ |
| PM6:FOR-IN | (010) stacking | 1.74                 | 3.61            | 0.193                          | 29.34                    |
| PM6:FOR-1F | (010) packing  | 1.74                 | 3.61            | 0.170                          | 33.31                    |
| PM6:FOR-2F | (010) stacking | 1.71                 | 3.67            | 0.137                          | 41.23                    |

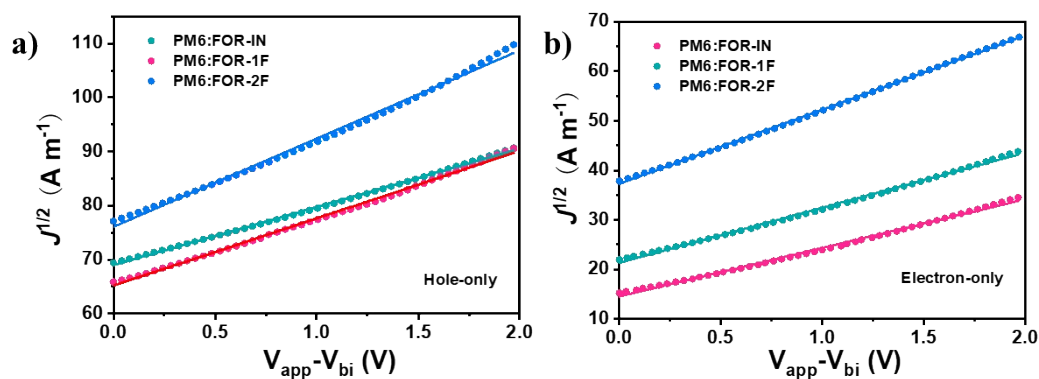

**Fig. S5** Hole-only (a) and electron-only (b) devices based on PM6:FOR-IN, PM6:FOR-1F and PM6:FOR-2F devices, respectively. The solid lines represent the fit using a model of single carrier SCLC with field-independent mobility. The  $J_D$ -V characteristic are corrected for the built-in voltage  $V_{\text{bi}}$  that arises the work function difference between the contacts.

**Table S13.** Hole mobilities and electron mobilities of four blends

|            | $\mu_h$               | $\mu_e$               | $\mu_h/\mu_e$ |
|------------|-----------------------|-----------------------|---------------|
| PM6:FOR-IN | $6.71 \times 10^{-5}$ | $5.55 \times 10^{-5}$ | 1.21          |
| PM6:FOR-1F | $8.99 \times 10^{-5}$ | $7.12 \times 10^{-5}$ | 1.26          |
| PM6:FOR-2F | $1.54 \times 10^{-4}$ | $1.30 \times 10^{-4}$ | 1.18          |

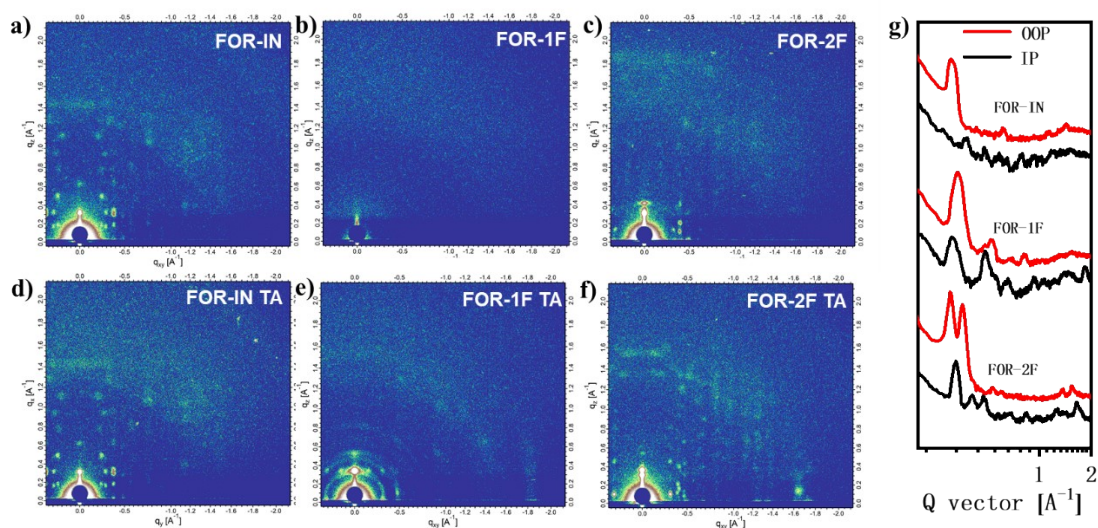

**Fig. S6** GIWAXS pattern for (a) FOR-IN pristine film, (b) FOR-1F pristine film, (c) FOR-2F pristine film, (d) FOR-IN film after TA (e) FOR-1F film after TA, (f) FOR-2F film after TA. (g) In-plane and Out-of -plane line cuts of the GIWAXS patterns for the corresponding pure films after TA.

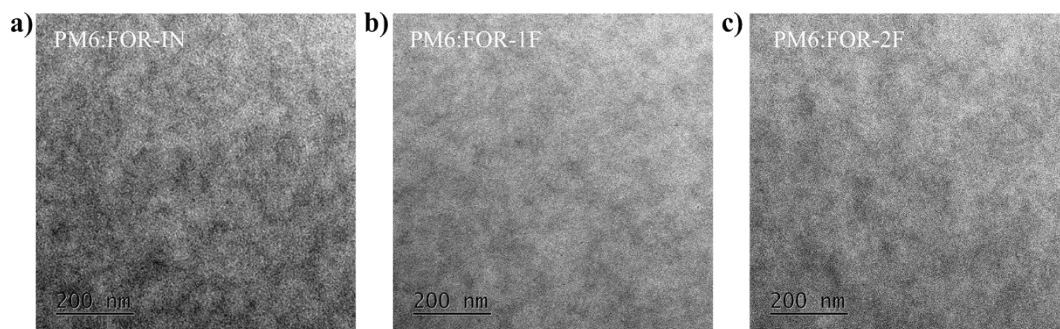

**Fig. S7** The TEM images of a) PM6:FOR-IN, b) PM6:FOR-1F, c) PM6:FOR-2F blend films.

## NMR and MS spectra



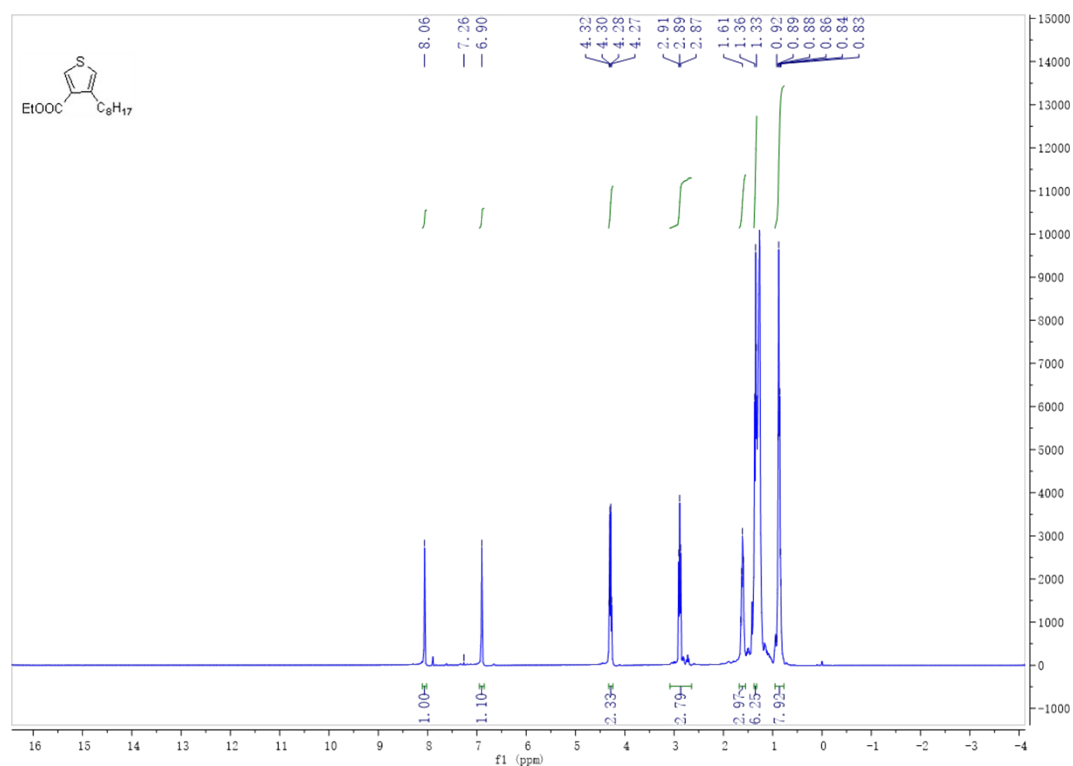

**Fig. S8** <sup>1</sup>H NMR spectra of Compound 5 in CHCl<sub>3</sub>

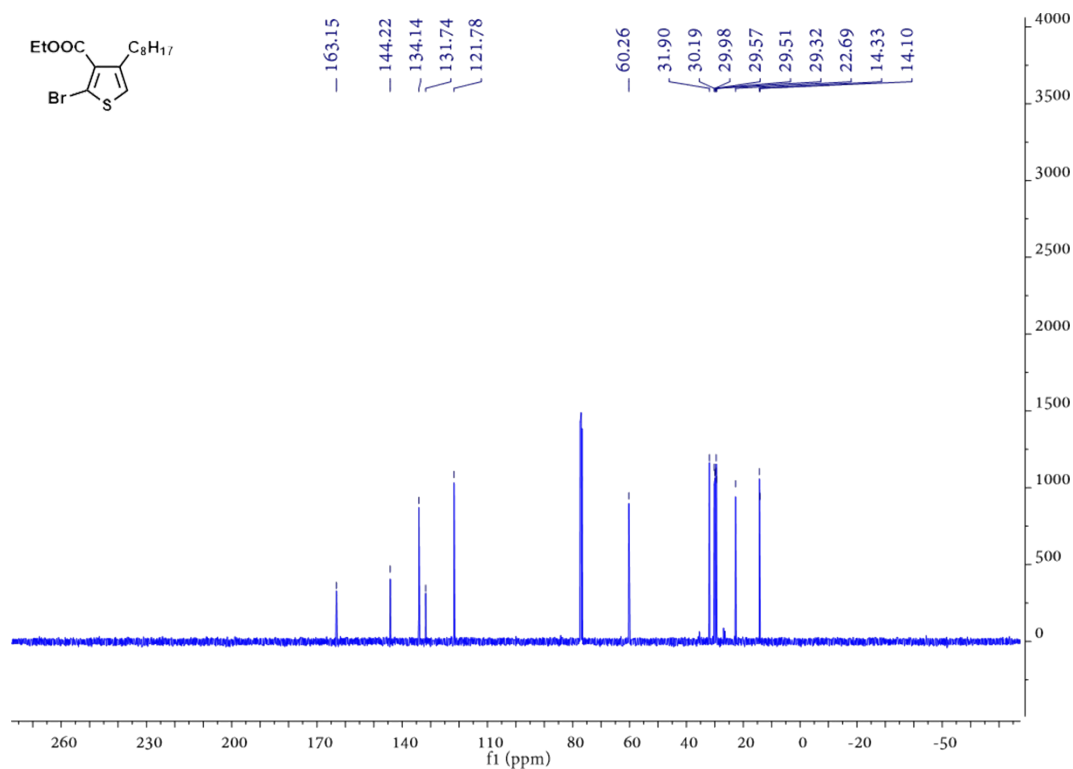

**Fig. S9** <sup>13</sup>C NMR spectra of Compound 5 in CHCl<sub>3</sub>

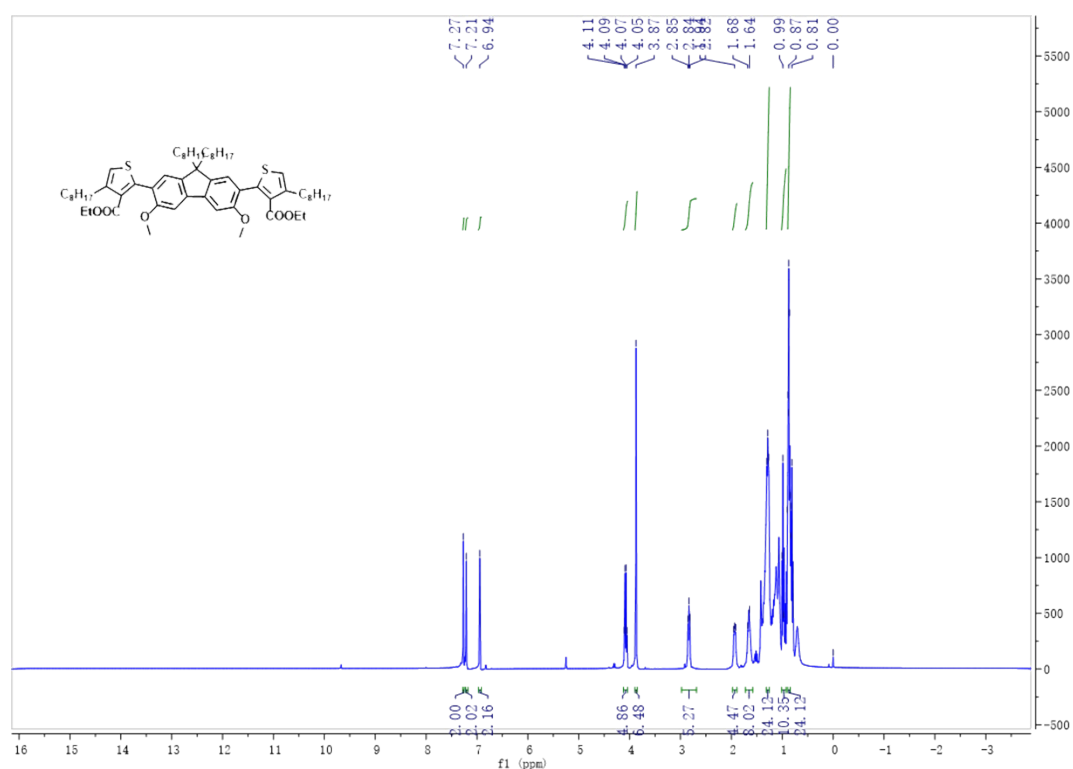

**Fig. S10** <sup>1</sup>H NMR spectra of Compound 8 in CHCl<sub>3</sub>

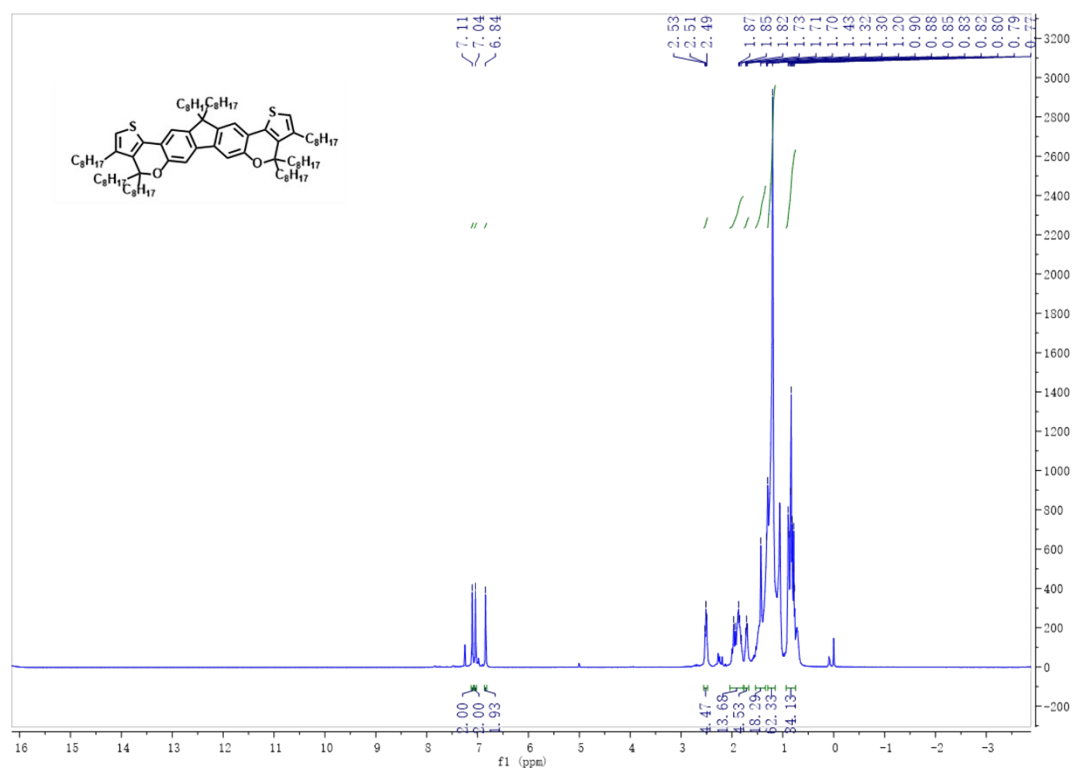

**Fig. S11** <sup>1</sup>H NMR spectra of Compound 9 in CHCl<sub>3</sub>

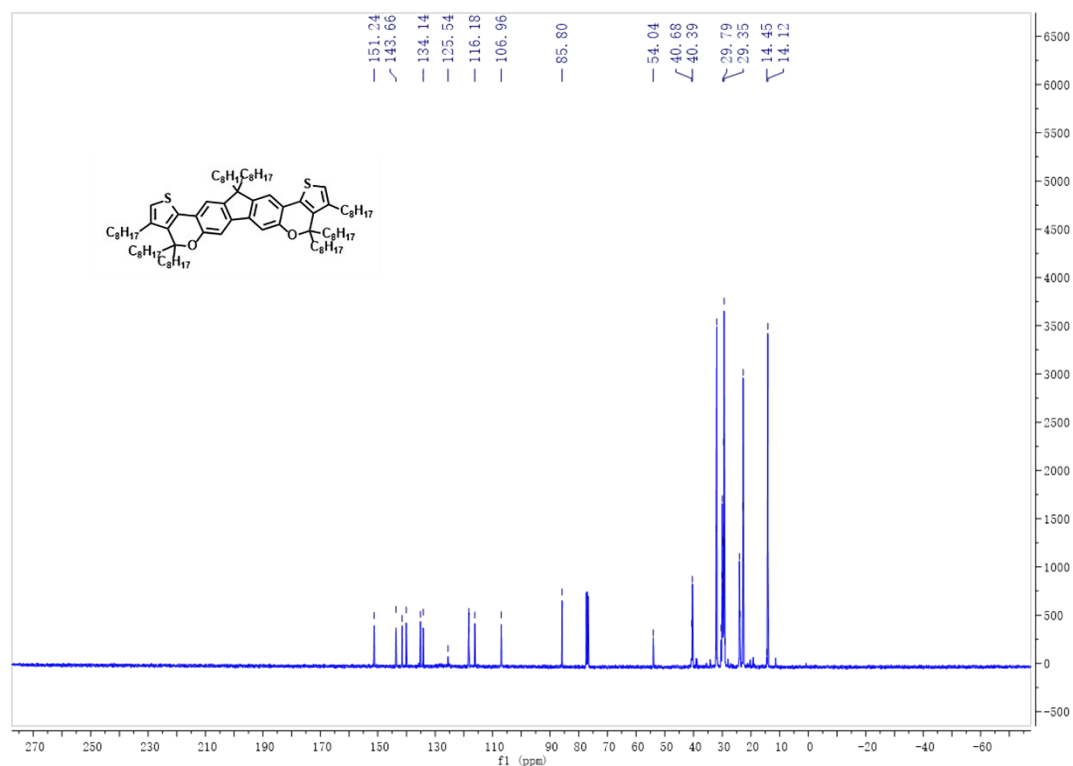

Fig. S12 <sup>13</sup>C NMR spectra of Compound 9 in CHCl<sub>3</sub>

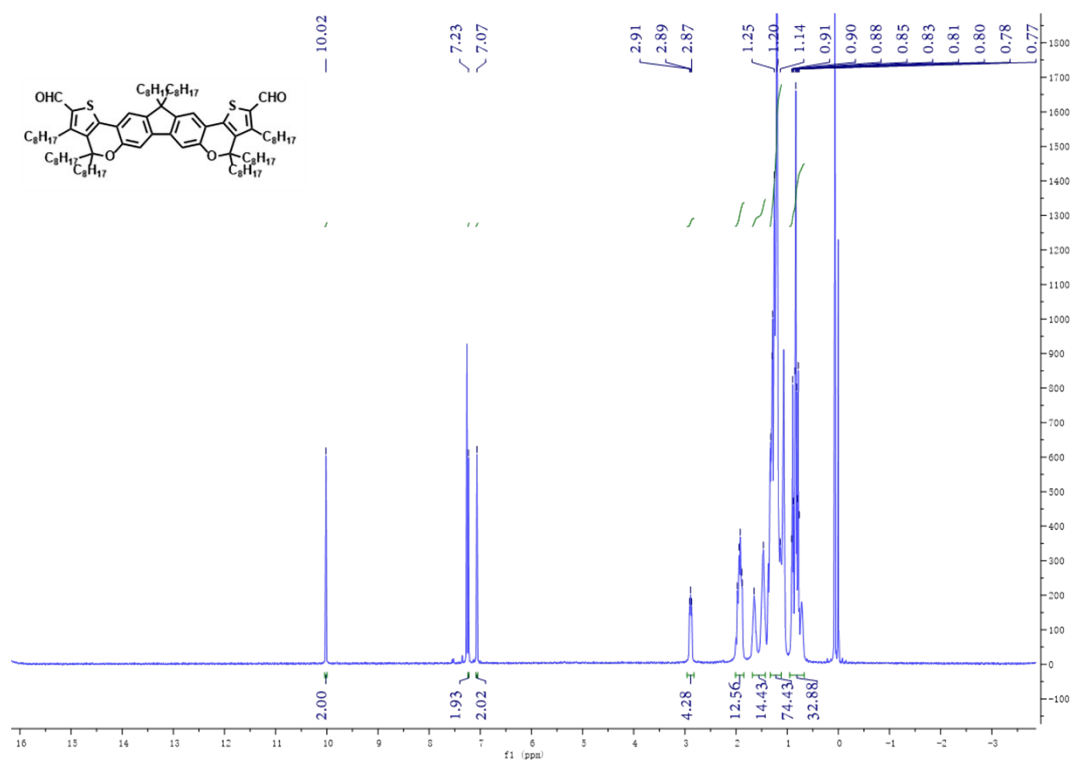

Fig. S13 <sup>1</sup>H NMR spectra of Compound 10 in CHCl<sub>3</sub>

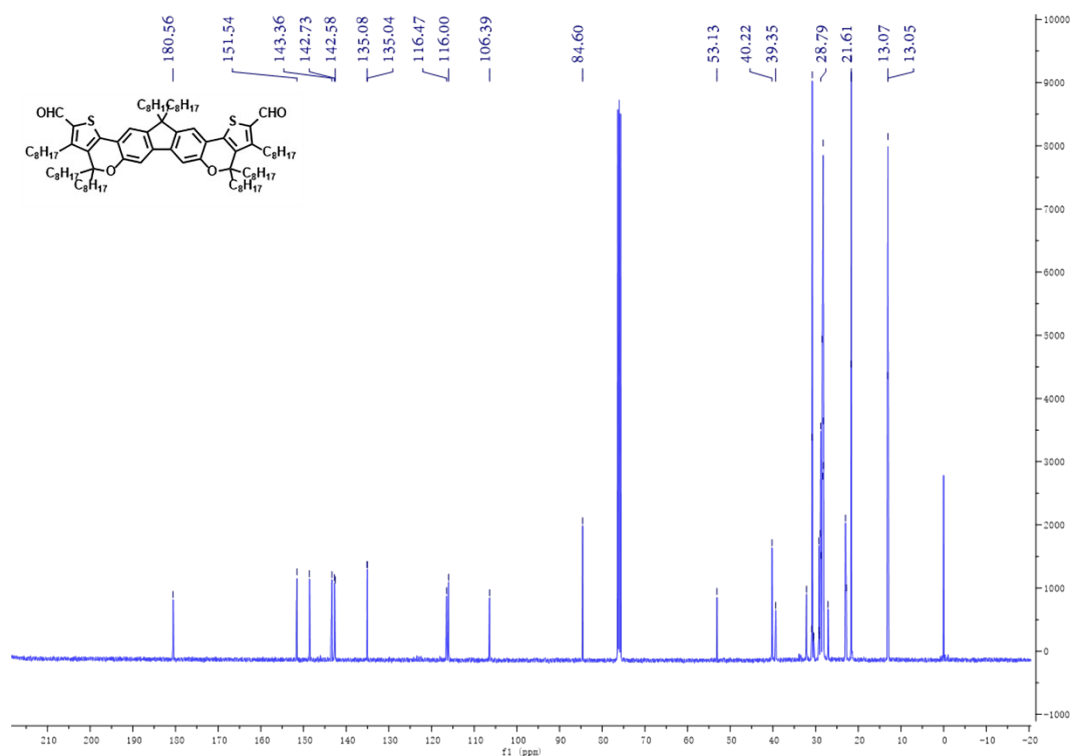

**Fig. S14**  $^{13}\text{C}$  NMR spectra of Compound 10 in  $\text{CHCl}_3$

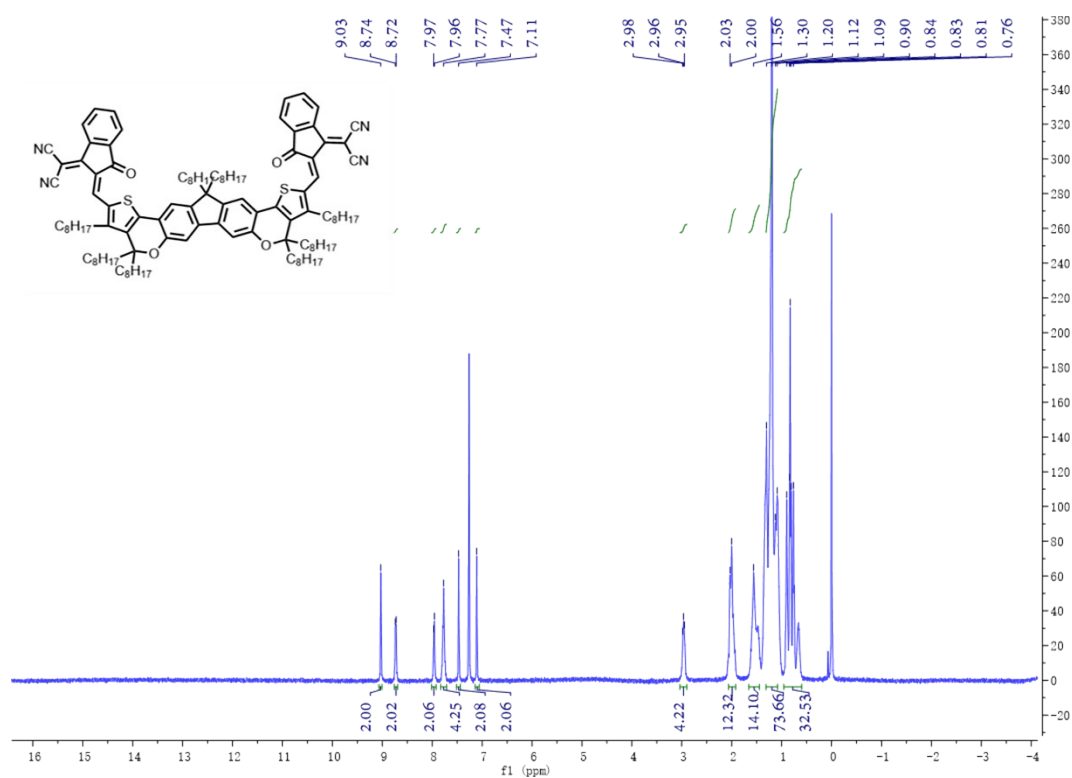

**Fig. S15**  $^1\text{H}$  NMR spectra of compound FOR-IN in  $\text{CHCl}_3$

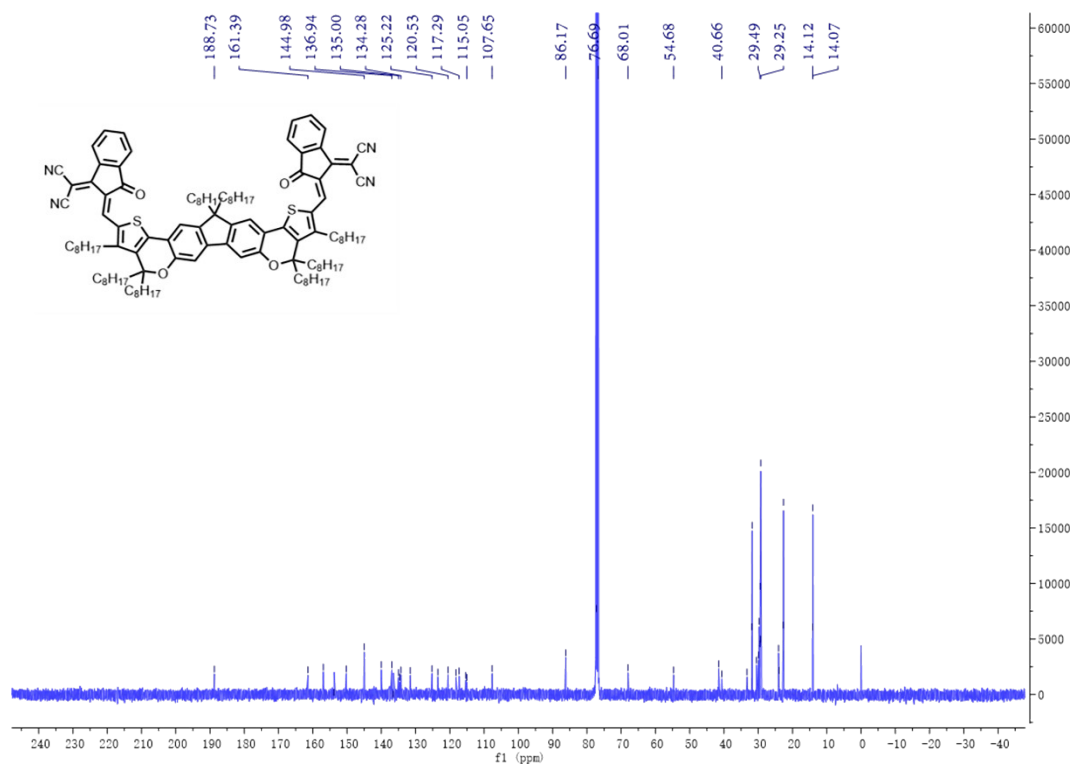

**Fig. S16**  $^{13}\text{C}$  NMR spectra of compound FOR-IN in  $\text{CHCl}_3$

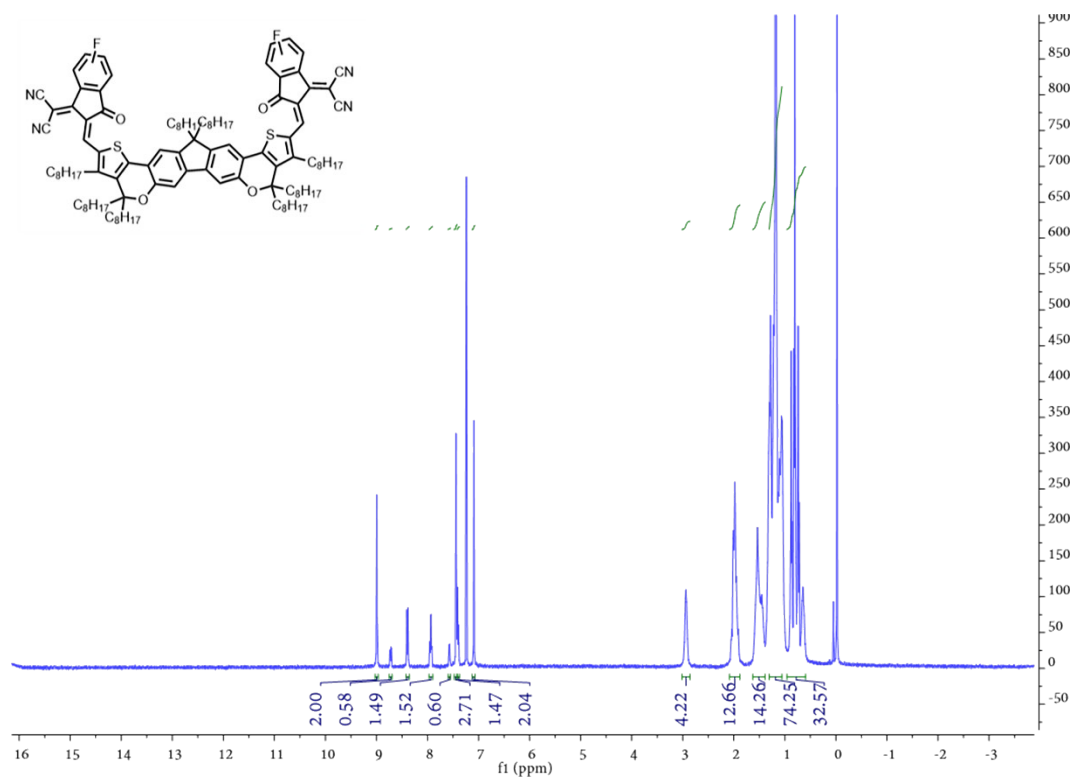

**Fig. S17**  $^1\text{H}$  NMR spectra of compound FOR-1F in  $\text{CHCl}_3$

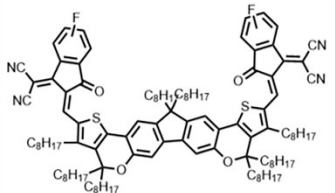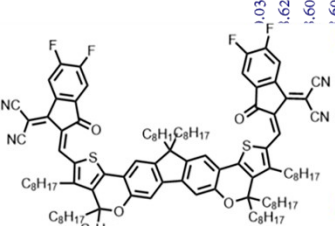

**Fig. S19**  $^1\text{H}$  NMR spectra of compound FOR-2F in  $\text{CHCl}_3$

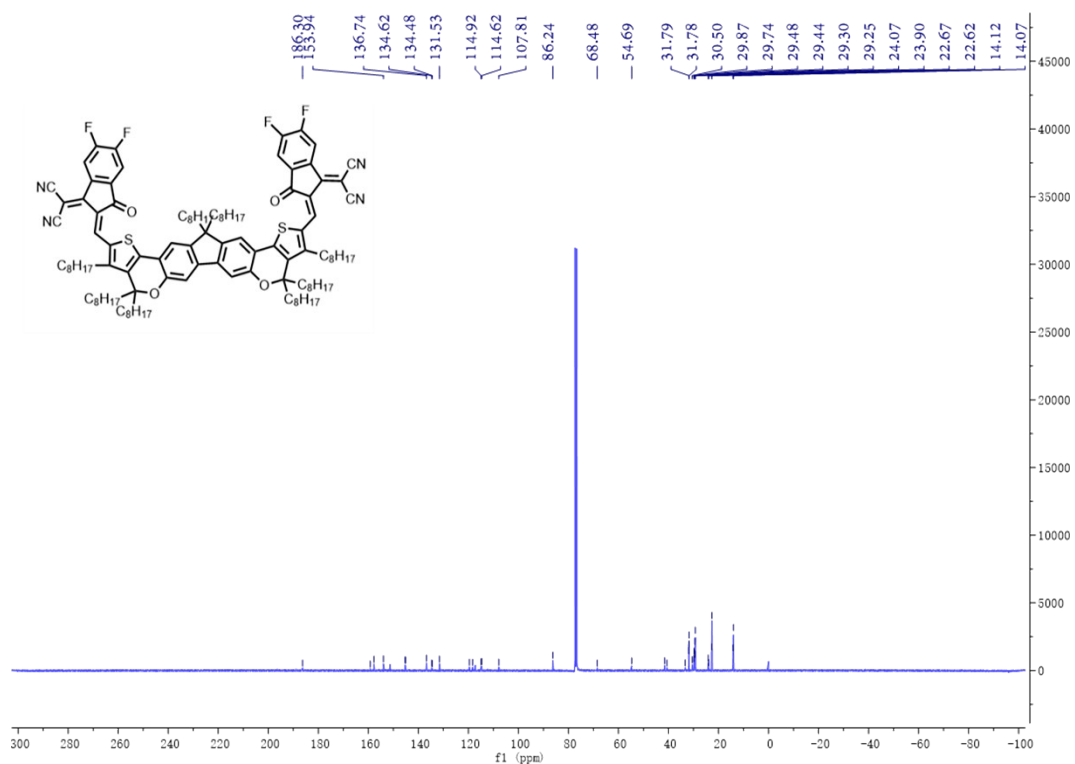

**Fig. S20** <sup>13</sup>C NMR spectra of compound FOR-2F in CHCl<sub>3</sub>

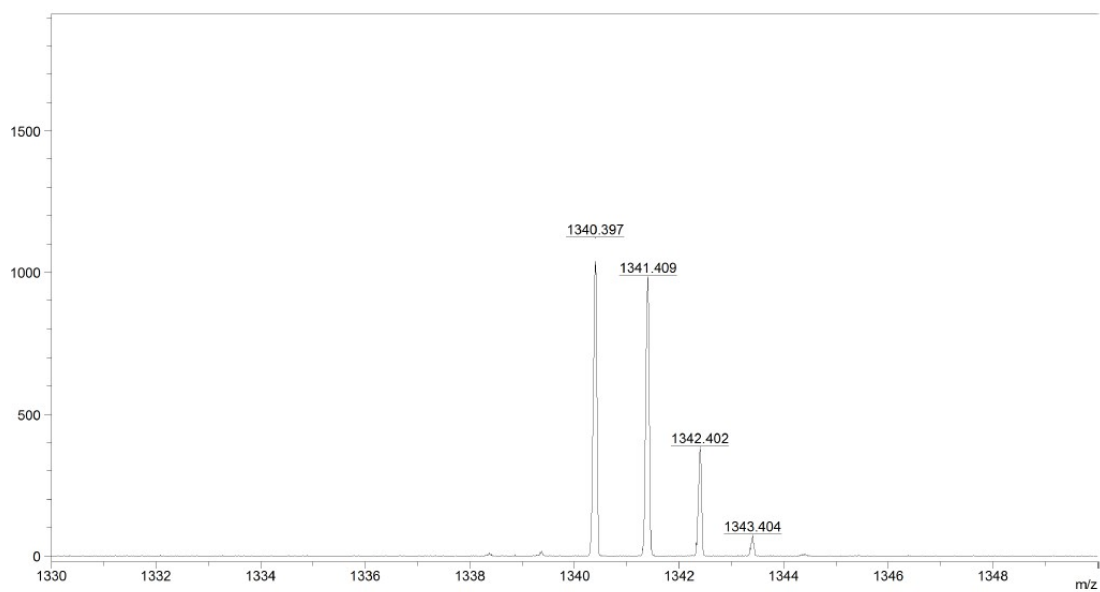

**Fig. S21** HR-MS plots of Compound 10

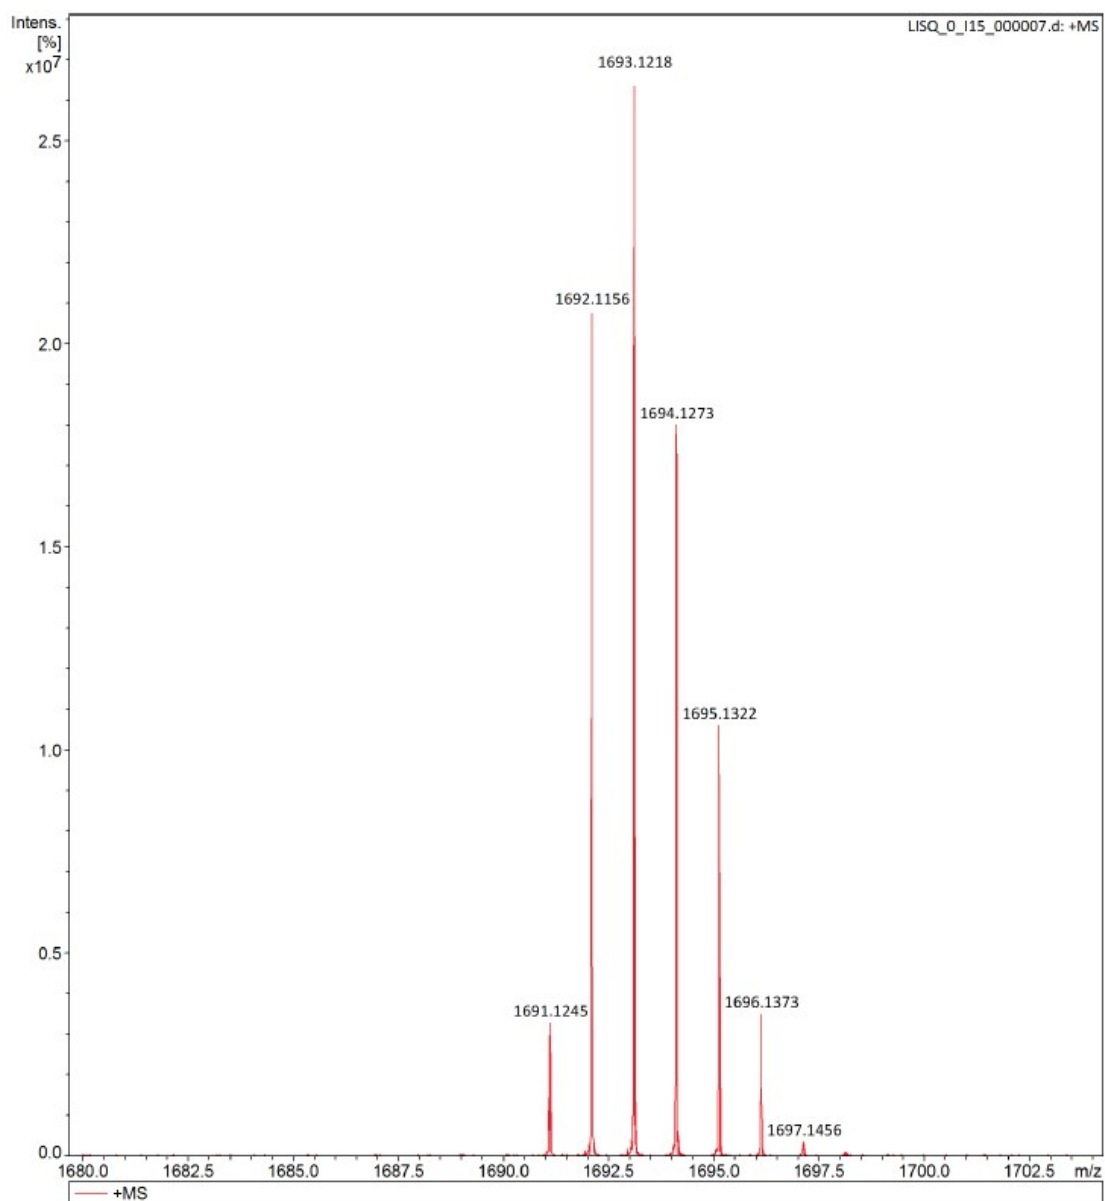

**Fig. S22** HR-MS plots of compound FOR-IN



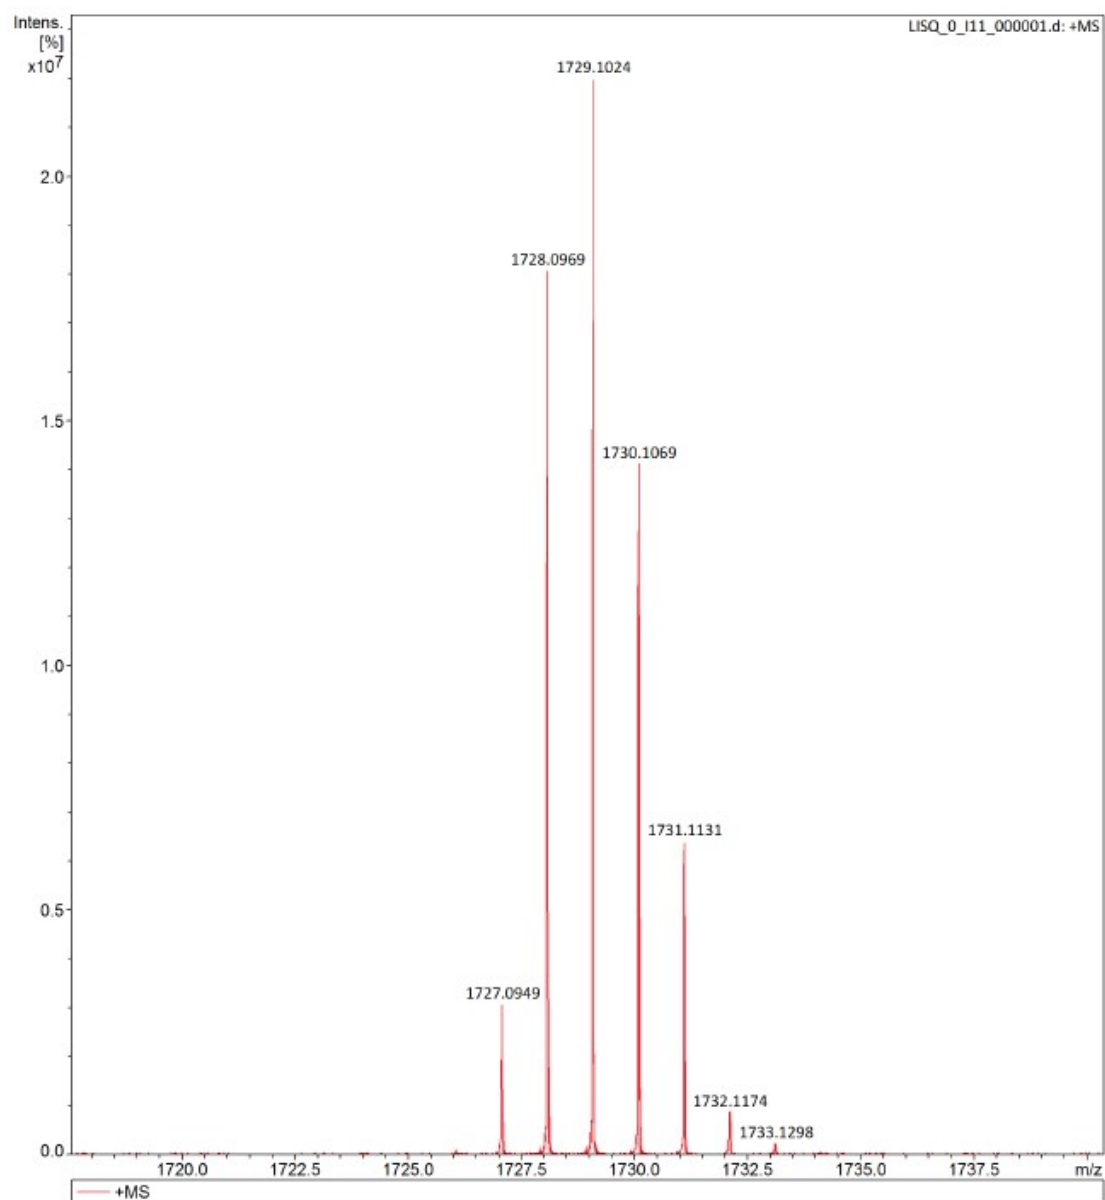

**Fig. S23** HR-MS plots of compound FOR-1F

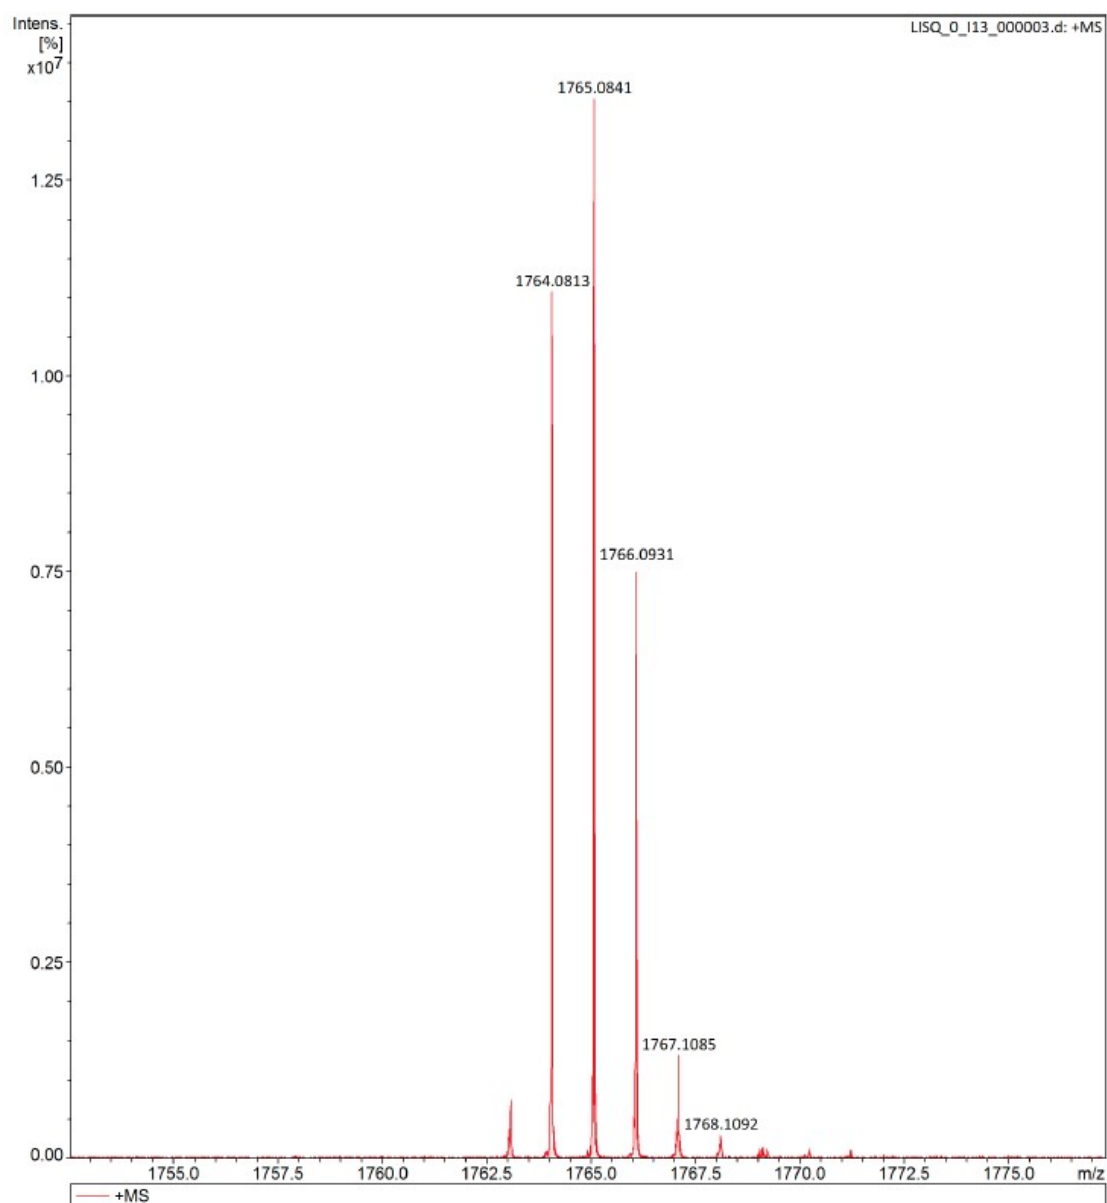

**Fig. S24** HR-MS plots of compound FOR-2F

## References

- 1 H. G. Kim, M. Kim, J. A. Clement, J. Lee, J. Shin, H. Hwang, D. H. Sin and K. Cho, *Chem. Mater.*, 2015, **27**, 6858-6868.
- 2 X. Ke, L. Meng, X. Wan, M. Li, Y. Sun, Z. Guo, S. Wu, H. Zhang, C. Li and Y. Chen, *J. Mater. Chem. A*, 2020, **8**, 9726-9732.
